# Supplementary material for: Selective enrichment of phosphopeptides by a metal–organic framework
Source: Royal Society of Chemistry journal article supplement (doi:10.1039/c3ay40308d), 2013-01-01
Supplement: c3ay40308d.pdf [file c3ay40308d.pdf]

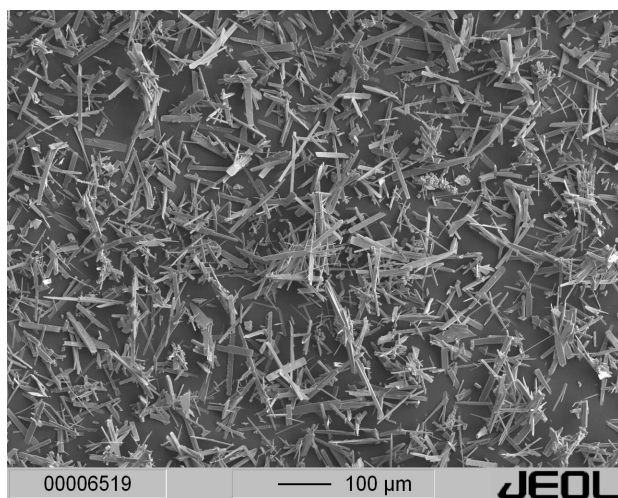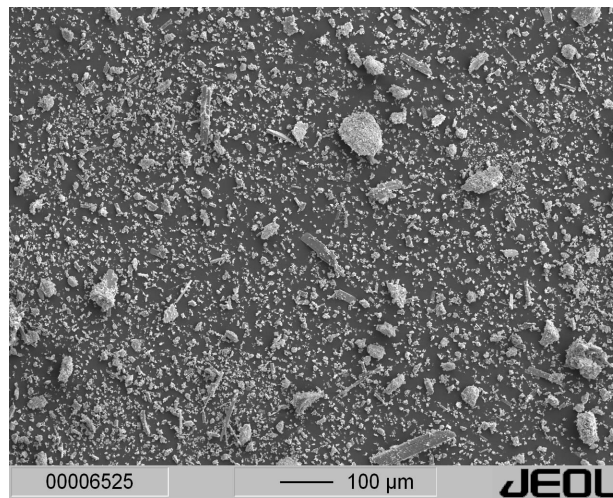

SEM pictures of  $[\text{Er}_2(\text{PDA})_3(\text{H}_2\text{O})] \cdot 2\text{H}_2\text{O}$  before (left) and after (right) grinding.

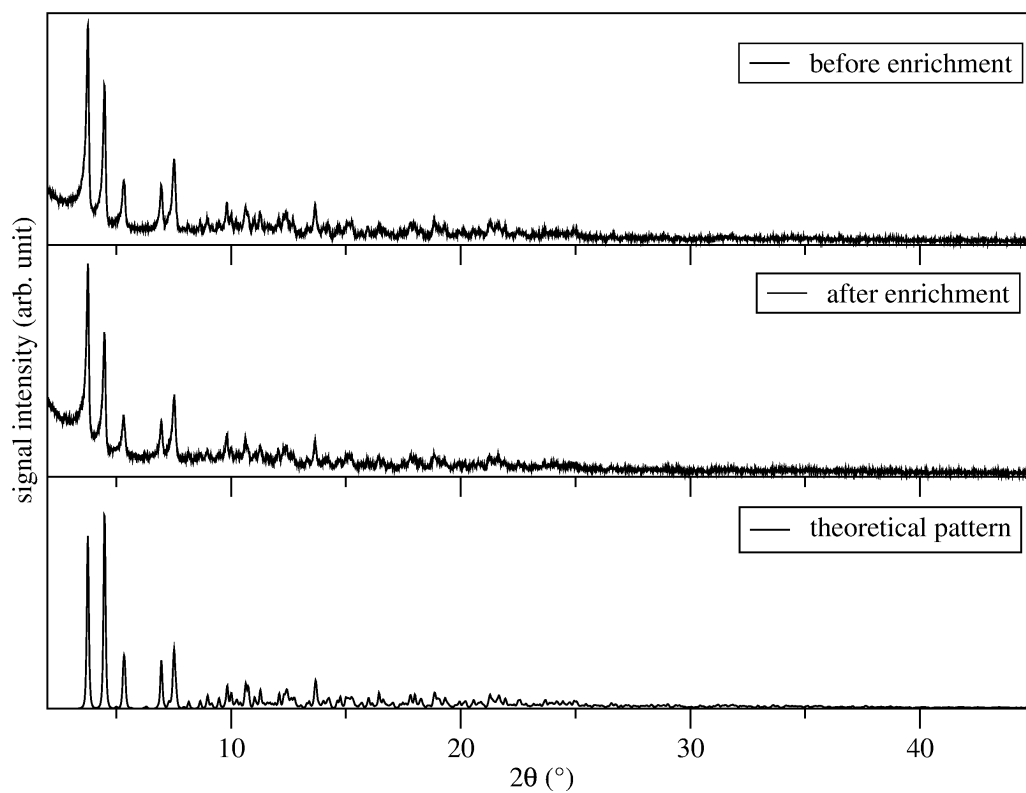

XRD pattern of  $[\text{Er}_2(\text{PDA})_3(\text{H}_2\text{O})] \cdot 2\text{H}_2\text{O}$  before and after enrichment, compared with the theoretical pattern (Pan et al., *J. Am. Chem. Soc.* 2003, 125(10), 3062-3067).
